# Supplementary material for: Artificial intelligence supported anemia control system (AISACS) to prevent anemia in maintenance hemodialysis patients
Source: PubMed Central journal article supplement (PMC7976591; doi:10.7150/ijms.53298), 2021-02-22
Supplement: ijmsv18p1831s1.pdf [file ijmsv18p1831s1.pdf]

**Supplementary table 1. Background**

|                                  | Hospital S     |                | Hospital K     |
|----------------------------------|----------------|----------------|----------------|
|                                  | S <sub>1</sub> | S <sub>2</sub> | K <sub>1</sub> |
|                                  | (N=130)        | (N=81)         | (N=16)         |
| Sex                              |                |                |                |
| Male                             | 78             | 49             | 9              |
| Female                           | 52             | 32             | 7              |
| Age (years)                      |                |                |                |
| Mean                             | 78.0           | 65.6           | 68.3           |
| Range                            | 26–89          | 35–84          | 51-86          |
| Hemodialysis period              |                |                |                |
| Mean                             | 9.7            | 11.9           | 3.5            |
| Range                            | 1–42           | 1–35           | 1-11           |
| Primary disease                  |                |                |                |
| Chronic glomerulonephritis (CGN) | 62             | 49             | 2              |
| Diabetes                         | 32             | 19             | 8              |
| Renal sclerosis                  | 15             | 10             | 3              |
| Cystic kidney                    | 8              | 0              | 0              |
| Ureteral stone                   | 1              | 0              | 0              |
| Other                            | 12             | 3              | 3              |
| Erythropoiesis-stimulating agent |                |                |                |
| Darbepoetin alfa                 | 121            | 68             | 16             |
| Epoetin beta pegol               | 9              | 11             | 0              |
| No administration                | 0              | 2              | 0              |
| Iron supplement                  |                |                |                |
| Sodium ferrous citrate           | 32             | 22             | 1              |
| Ferrous fumarate                 | 5              | 4              | 0              |
| Saccharated ferric oxide         | 50             | 26             | 11             |
| Sodium ferrous citrate           | 8              | 7              | 0              |

|                            |    |    |   |
|----------------------------|----|----|---|
| + Saccharated ferric oxide |    |    |   |
| No administration          | 35 | 22 | 4 |

**Supplementary table 2. Ranges of blood examination dataset**

|            | Dataset                | Examination item | Start     | End       |
|------------|------------------------|------------------|-----------|-----------|
| Hospital S | S <sub>1</sub> (N=130) | Hb (g/dl)        | 10.3±0.8  | 10.8±0.6  |
|            |                        | MCV (fl)         | 89.6±7.3  | 92.5±5.3  |
|            |                        | TSAT (%)         | 21.6±11.4 | 31.7±29.6 |
|            |                        | Ferritin (ng/ml) | 53.7±50.3 | 72.7±46.7 |
|            | S <sub>2</sub> (N=81)  | Hb (g/dl)        | 10.5±0.8  | 10.9±0.9  |
|            |                        | MCV (fl)         | 92.0±7.0  | 92.6±6.1  |
|            |                        | TSAT (%)         | 21.7±10.0 | 26.8±14.1 |
|            |                        | Ferritin (ng/ml) | 52.6±37.8 | 61.8±41.3 |
| Hospital K | K <sub>1</sub> (N=16)  | Hb (g/dl)        | 11.1±0.7  | 10.9±0.7  |
|            |                        | MCV (fl)         | 93.8±5.7  | 95.3±4.5  |
|            |                        | TSAT (%)         | 23.2±10.1 | 23.4±6.4  |
|            |                        | Ferritin (ng/ml) | 50.1±31.9 | 34.8±14.0 |

**Supplementary table 3. Mean ESAs administered dosage**

|            |                        | Darbepoetin alfa             | Epoetin beta pegol             |
|------------|------------------------|------------------------------|--------------------------------|
| Hospital S | S <sub>1</sub> (N=130) | 20.2±10.1 µg/week<br>(N=120) | 26.1±8.9 µg/2 weeks<br>(N=10)  |
|            | S <sub>2</sub> (N=81)  | 18.8±14.1 µg/week<br>(N=68)  | 36.0±15.7 µg/2 weeks<br>(N=11) |
